# Supplementary material
Source: PubMed Central journal article supplement (PMC6250051)

# Supplementary Figure 1

**A**

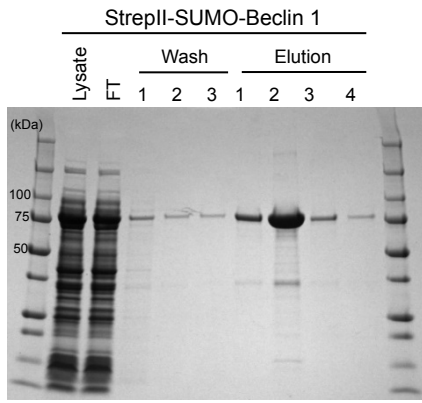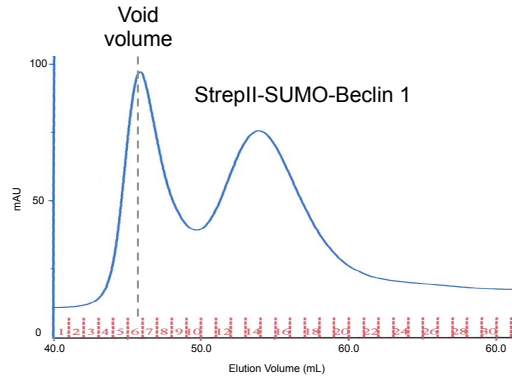

**B**

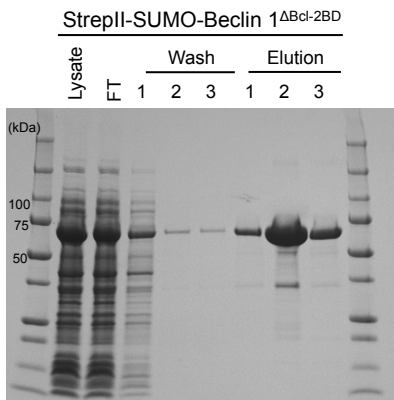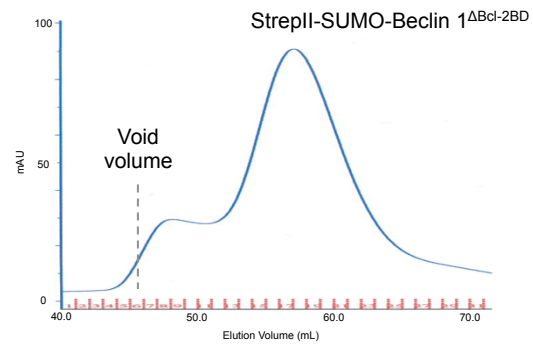

**C**

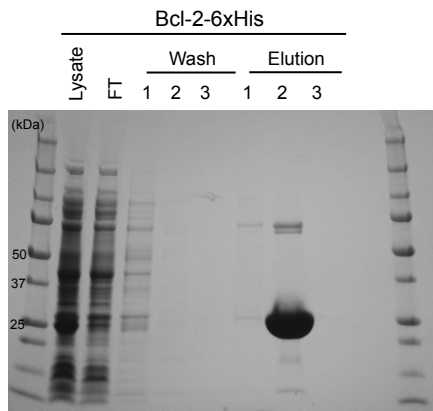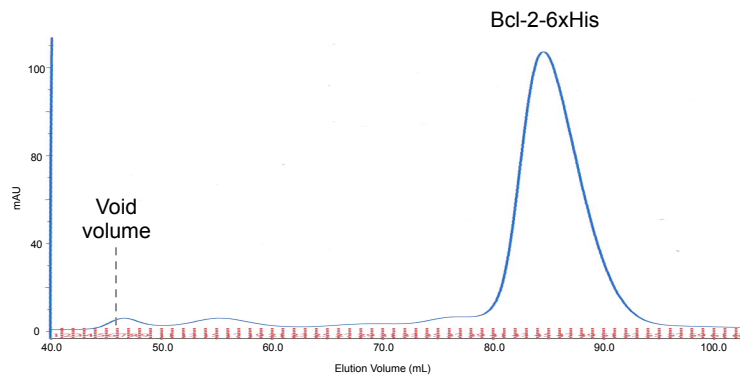

**D**

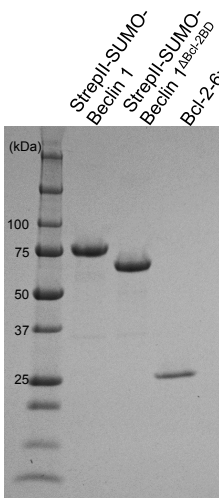

# Supplementary Figure 2

SW025821

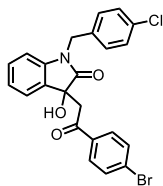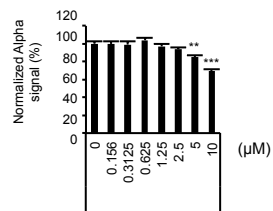

SW033302

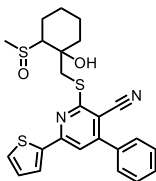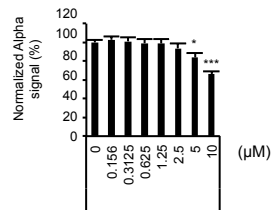

SW063058

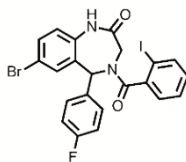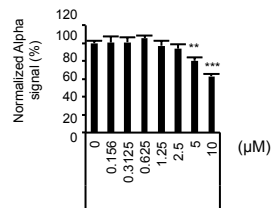

SW076956

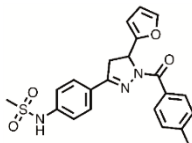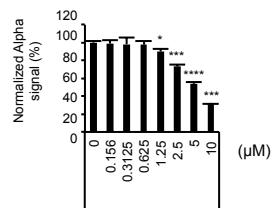

SW095605

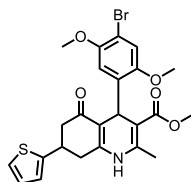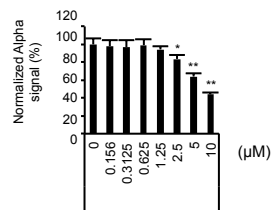

BRD1991

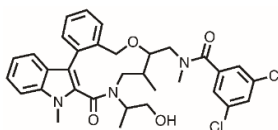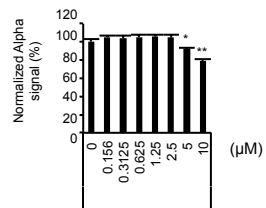

# Supplementary Figure 3

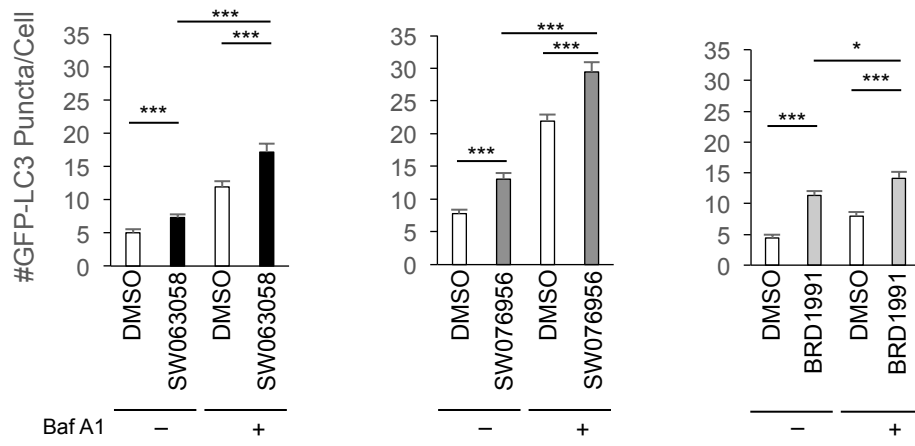

**A**

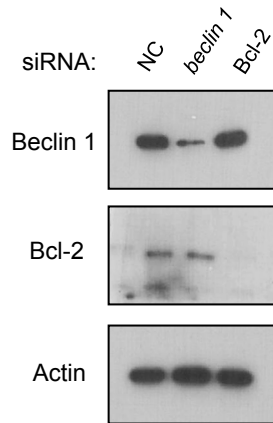

**B**

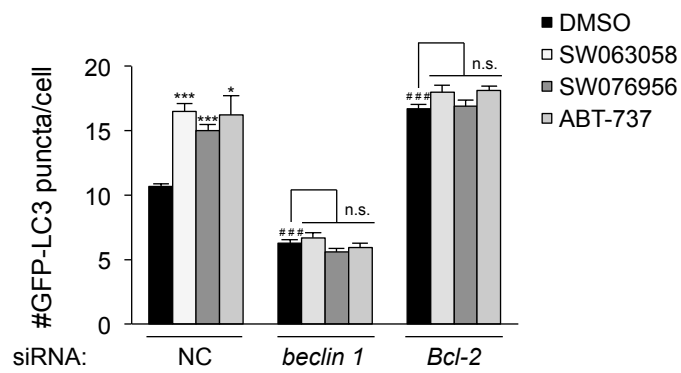

**C**

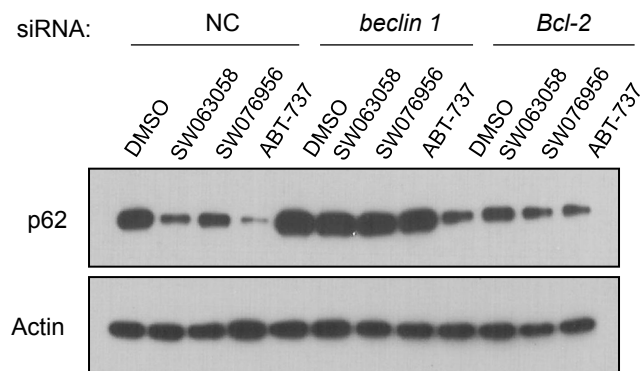

# Supplementary Figure 5

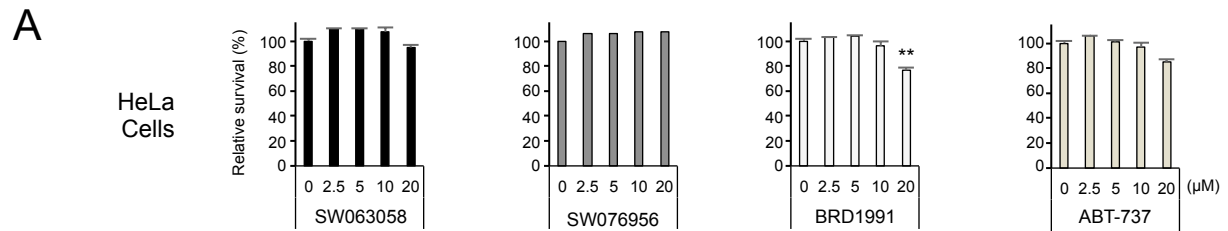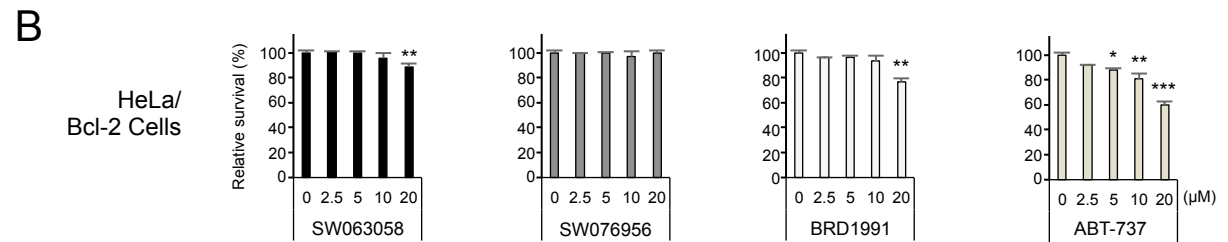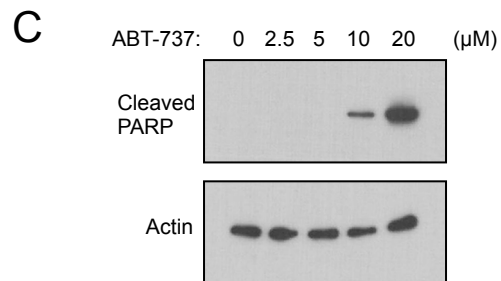

# Supplementary Figure 6

A

| Sample | SW063058                |           | SW076956                |           | BRD1991                 |           |
|--------|-------------------------|-----------|-------------------------|-----------|-------------------------|-----------|
|        | Avg. Conc. (µM in cell) | Std. Dev. | Avg. Conc. (µM in cell) | Std. Dev. | Avg. Conc. (µM in cell) | Std. Dev. |
| 1 h    | 0.58                    | 0.01      | 4.18                    | 0.25      | 1.19                    | 0.08      |
| 2 h    | 0.94                    | 0.07      | 2.92                    | 0.04      | 2.57                    | 0.06      |
| 4 h    | 0.82                    | 0.07      | 4.93                    | 0.68      | 3.13                    | 0.85      |
| 24 h   | 0.56                    | 0.02      | 6.19                    | 0.08      | 2.83                    | 0.32      |

B

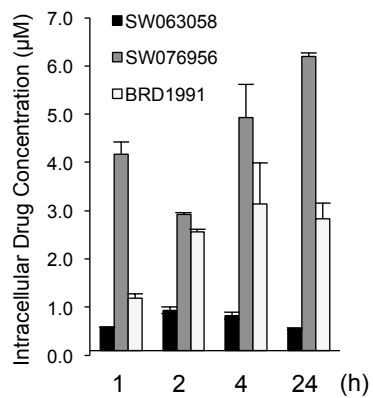

Supplementary Figure 7

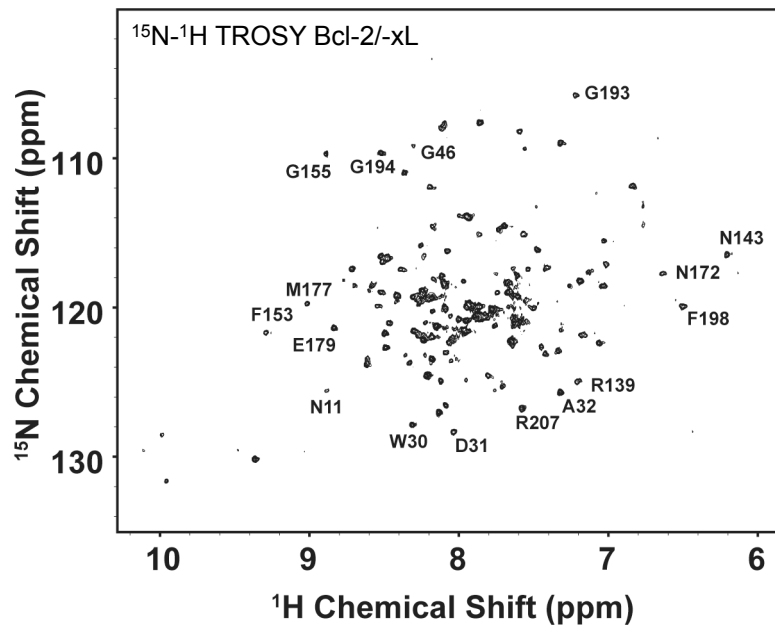

Supplement: NIHMS990607-supplement-S1-S7.pdf [file NIHMS990607-supplement-S1-S7.pdf]
