# Supplementary material
Source: PubMed Central journal article supplement (PMC6250051)
Supplement: NIHMS990607-supplement-Supplementary_Table_1.pdf [file NIHMS990607-supplement-Supplementary_Table_1.pdf]

# Supplementary Table 1

## Metabolic Stability and Serum Binding

|                                    | SW063058 | SW076956 | BRD1991 |
|------------------------------------|----------|----------|---------|
| Solubility ( $\mu\text{M}$ )       |          |          |         |
| PBS                                | 0.72     | 30       | 7.7     |
| AlphaLISA Buffer                   | 119      | 202      | 43.3    |
| Microsomal Stability (% remaining) |          |          |         |
| Mouse                              | 1.4      | 0.8      | 0.0     |
| Human                              | 36.1     | 0.4      | 0.0     |
| Plasma Stability (% remaining)     |          |          |         |
| Mouse                              | 137.6    | 111.6    | 90.9    |
| Human                              | 101.2    | 111.0    | 105.7   |
